# Supplementary material
Source: MDPI journal article supplement (https://www.mdpi.com/2075-4701/14/2/145)
Supplement: s1 [file s1]

# Controllable Synthesis of Flower-Like Hierarchical $\text{CuCo}_2\text{S}_4$ Nanostructure Arrays for High-Performance Hybrid Supercapacitors

Man Li <sup>1</sup>, Ningning Yu <sup>1</sup>, Lei Xu <sup>1</sup>, Wenyu Wang <sup>1</sup>, Fuxiang Wei<sup>1,3,\*</sup>, Jiqui Qi <sup>1,2</sup> and Yanwei Sui <sup>1,3</sup>

<sup>1</sup> China University of Mining & Technology, Xuzhou, 221116, PR China; lm1417514487@163.com(M.L.); 2273069420@qq.com(N.Y.); jskxl7@163.com(L.X.); wvy21180049@163.com(W.W.)

<sup>2</sup> Jiangsu Province Engineering Laboratory of High Efficient Energy Storage Technology and Equipments, China University of Mining & Technology, Xuzhou, PR China; flower\_cumt@outlook.com(J.Q.);

<sup>3</sup> Jiangsu Huaihai New Energy Co., Ltd; weifuxiang2001@163.com (F.W.); wyds123456@outlook.com(Y.S.)

\* Correspondence: weifuxiang2001@163.com (F.W.)

## 1. Characterization

The morphology and microstructure were characterized by scanning electron microscopy (SEM, SU8010) and transmission electron microscopy (TEM, Tecnai G2 F20). X-ray diffraction (XRD, a Rigaku D/max-2550 PC) tests were carried out to analyze the p crystal structure with Cu  $K\alpha$  radiation. The chemical state of the samples was analyzed using X-ray photoelectron spectroscopy (XPS, ESCALAB 250Xi). Fourier-transform infrared spectroscopy (FT-IR) was performed on a Perkin-Elmer Spectrum One B instrument using the KBr pellet technique.

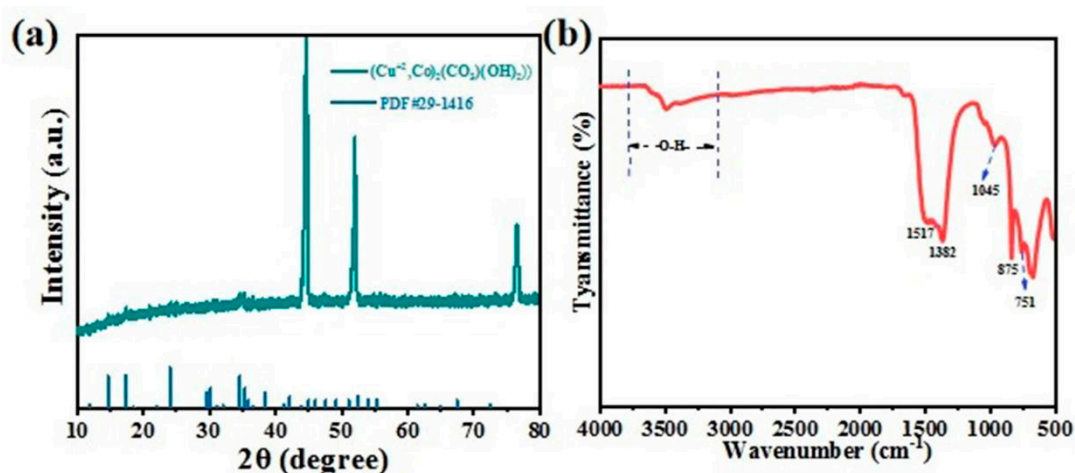

Figure S1. (a) XRD patterns of Cu-CCO, (b) Infrared spectra of Cu-CCO samples.

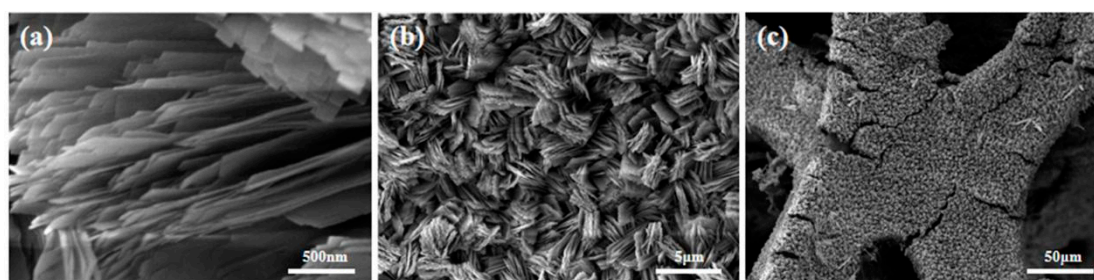

Figure S2. SEM images of Cu-CCO precursor nanosheet arrays.

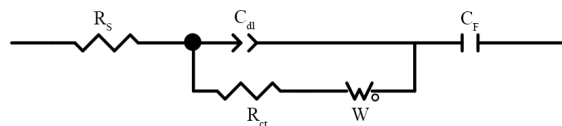

Figure S3. Equivalent circuit for three-electrode configuration cell.

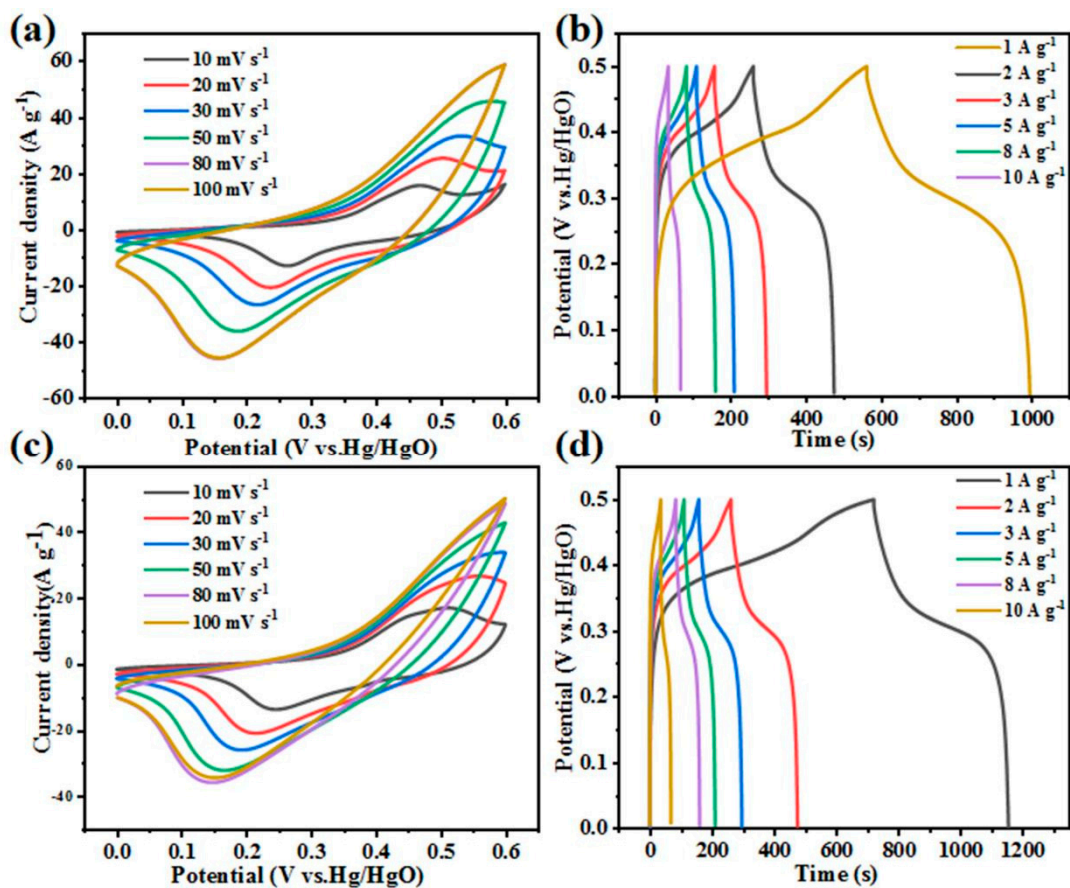

Figure S4. CV and GCD tests at different sulfide concentrations: (a,b) CuCo<sub>2</sub>S<sub>4</sub>-5M; (c,d) CuCo<sub>2</sub>S<sub>4</sub>-7M.

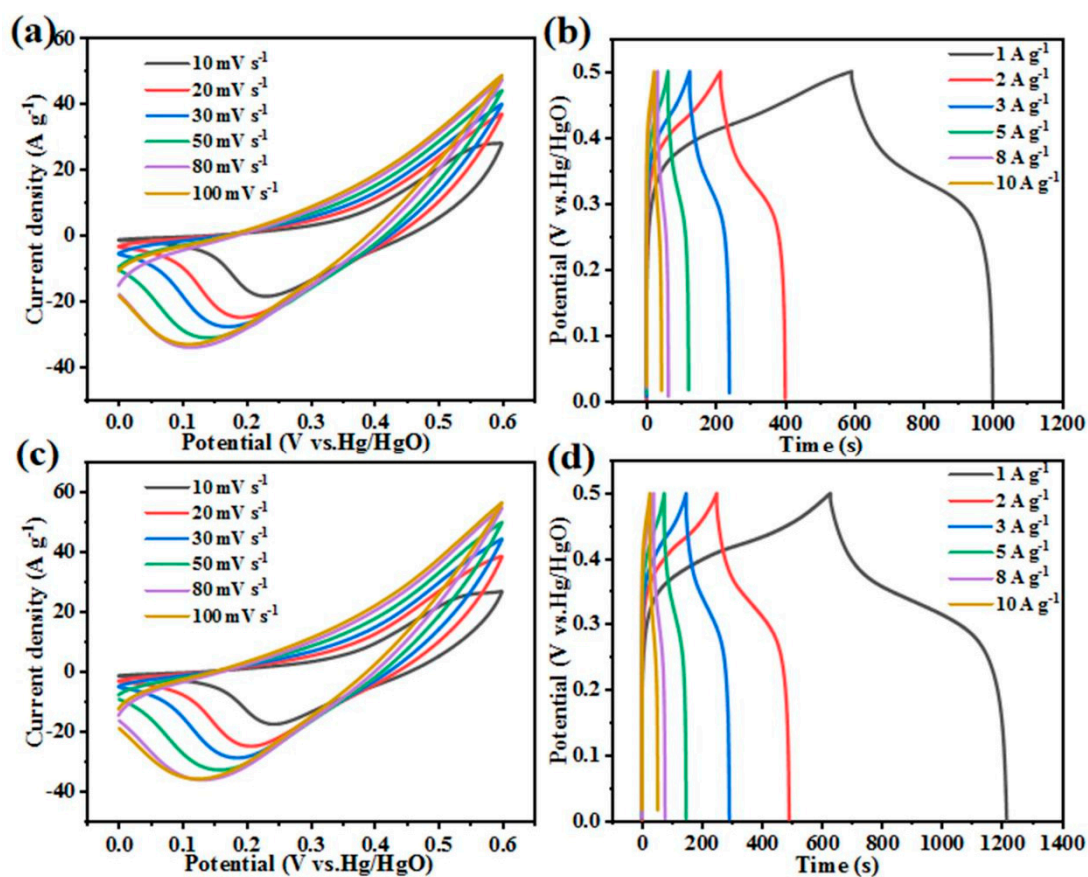

Figure S5. CV and GCD tests with different vulcanization times: (a,b) 4h; (c,d) 8h.

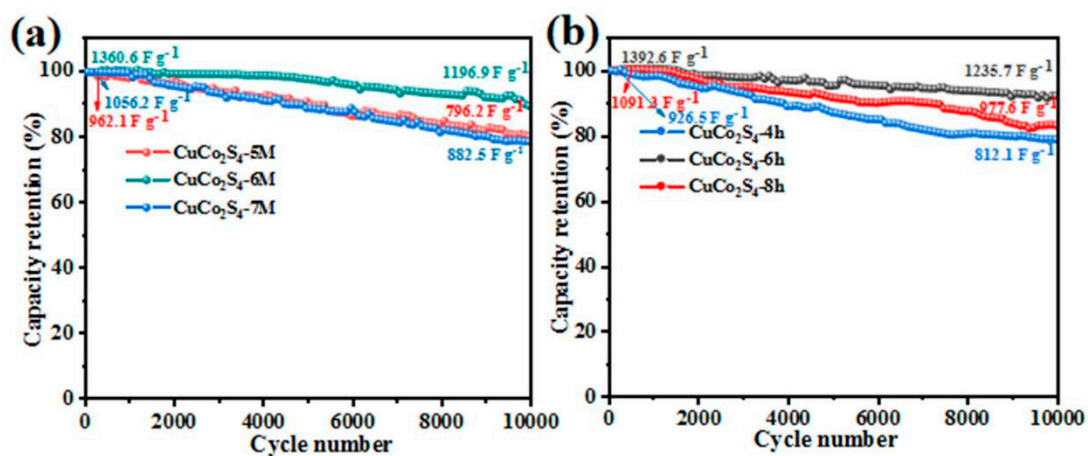

Figure S6. Cycling performance of  $\text{CuCo}_2\text{S}_4$  electrodes with (a) different sulfide concentrations and (b) different vulcanization times after 10,000 cycles at  $10 \text{ A g}^{-1}$ .

Table S1. Performance comparison of similar materials.

| Device                                           | Power density ( $\text{W kg}^{-1}$ ) | Energy density ( $\text{Wh kg}^{-1}$ ) | Cycling performance             |
|--------------------------------------------------|--------------------------------------|----------------------------------------|---------------------------------|
| HU- $\text{CuCo}_2\text{S}_4$ //AC               | 4000                                 | 49.8                                   | 88% retention after 5000 cycles |
| $\text{CuCo}_2\text{S}_4$ -MoS <sub>2</sub> //AC | 400                                  | 38.22                                  | 89% retention over 1000 cycles  |
| $\text{CuCo}_2\text{O}_4$ @MoNi-LDH//AC          | 795.9                                | 68.1                                   | 88% retention after 6000 cycles |

|                                               |              |             |                                          |
|-----------------------------------------------|--------------|-------------|------------------------------------------|
| CuCo <sub>2</sub> O <sub>4</sub> @NiMnLDH//AC | 730          | 92.2        | 85.28% retention after 5000 cycles       |
| CuCo <sub>2</sub> O <sub>4</sub> @NiO//AC     | 750          | 38.9        | Retention of 81.3% after 6000 cycles     |
| <b>CuCo<sub>2</sub>S<sub>4</sub>/RGO</b>      | <b>812.1</b> | <b>61.8</b> | <b>92% retention after 10,000 cycles</b> |
